# Supplementary material for: A bias-free CuBi2O4–CuWO4 tandem cell for solar-driven water splitting
Source: Royal Society of Chemistry journal article supplement (doi:10.1039/d1qi00088h), 2021-01-01
Supplement: d1qi00088h1.pdf [file d1qi00088h1.pdf]

## Supporting Information

### A Bias-free $\text{CuBi}_2\text{O}_4$ - $\text{CuWO}_4$ Tandem Cell for Solar-Driven Water Splitting

Yuwei Zhang<sup>a,b</sup>, Lina Wang<sup>a,b</sup> and Xiaoxiang Xu<sup>a,b\*</sup>

<sup>a</sup>*Putuo People's Hospital, Tongji University, Shanghai, 200060, China*

<sup>b</sup>*Shanghai Key Lab of Chemical Assessment and Sustainability, School of Chemical  
Science and Engineering, Tongji University, Shanghai, 200092, China*

*Email: [xxxu@tongji.edu.cn](mailto:xxxu@tongji.edu.cn), telephone: +86-21-65986919*

Corresponding author

Xiaoxiang Xu (Email: [xxxu@tongji.edu.cn](mailto:xxxu@tongji.edu.cn); Tel: +86-021-65986919)

#### List of Content

Figure S1 XRD pattern of  $\text{CuBi}_2\text{O}_4$  and  $\text{CuWO}_4$  film on FTO substrate, standard patterns are also included for comparisons. No impurity phase is detected except signals from FTO substrate, i.e.  $\text{SnO}_2$ . S3

Figure S2 SEM-EDS mapping of  $\text{CuBi}_2\text{O}_4$  (a) and  $\text{CuWO}_4$  (b) film on FTO substrate

|                                                                                                                                                                                                  |     |
|--------------------------------------------------------------------------------------------------------------------------------------------------------------------------------------------------|-----|
|                                                                                                                                                                                                  | S4  |
| Figure S3 XPS survey spectra of (a) $\text{CuWO}_4$ film and (b) $\text{CuBi}_2\text{O}_4$ film                                                                                                  | S5  |
| Figure S4 XRD patterns of $\text{CuWO}_4$ film (a) and $\text{CuBi}_2\text{O}_4$ film (b) after PEC measurement                                                                                  | S6  |
| Figure S5 XRD patterns of $\text{CuBi}_2\text{O}_4$ film before (a) and after (b) PEC measurement (Peaks of $\text{CuBi}_2\text{O}_4$ and $\text{Bi}_2\text{O}_3$ overlap at the arrow position) | S7  |
| Figure S6 LSV of $\text{CuBi}_2\text{O}_4$ film under chopped AM 1.5 illumination with and without Pt deposited                                                                                  | S8  |
| Figure S7 SEM-EDS element analysis of $\text{CuBi}_2\text{O}_4/\text{Pt}$                                                                                                                        | S9  |
| Table S1 XPS data on the peak fitting analysis                                                                                                                                                   | S10 |

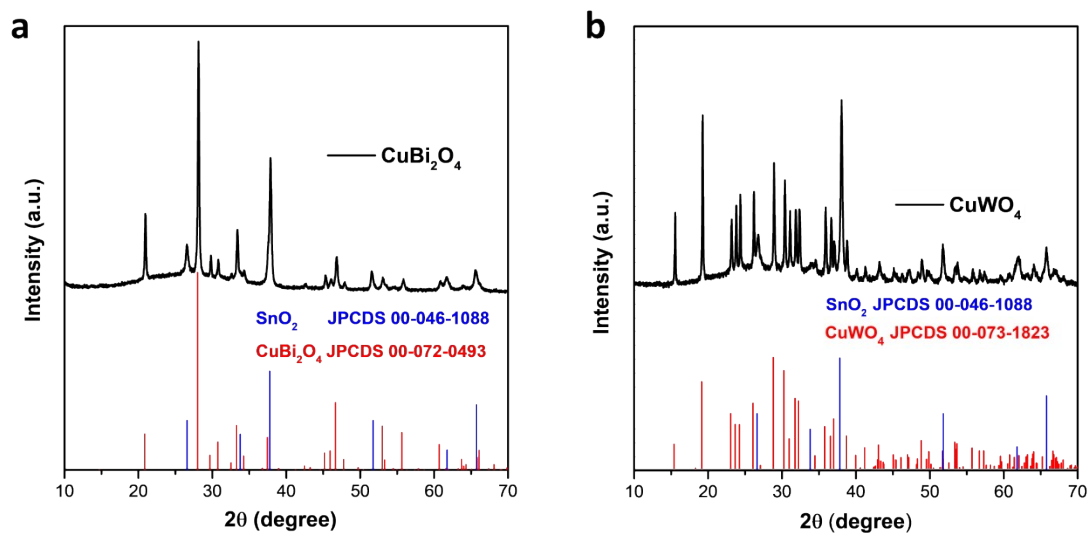

Figure S1 XRD pattern of CuBi<sub>2</sub>O<sub>4</sub> and CuWO<sub>4</sub> film on FTO substrate, standard patterns are also included for comparisons. No impurity phase is detected except signals from FTO substrate, i.e. SnO<sub>2</sub>.

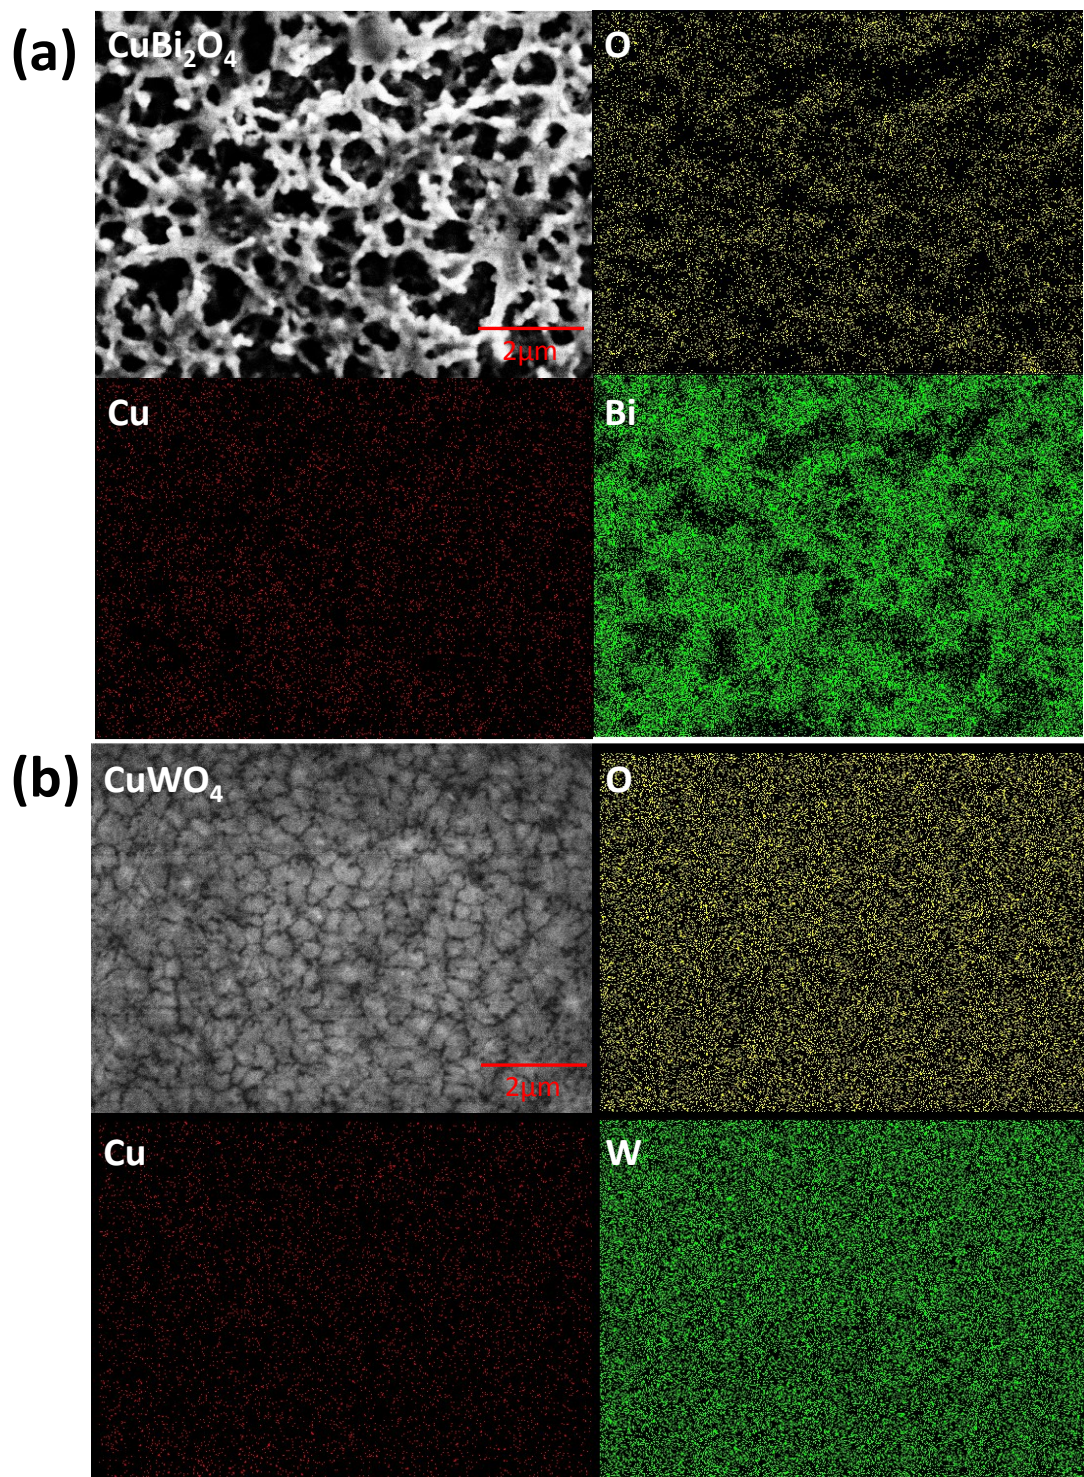

Figure S2 SEM-EDS mapping of  $\text{CuBi}_2\text{O}_4$  (a) and  $\text{CuWO}_4$  (b) film on FTO substrate

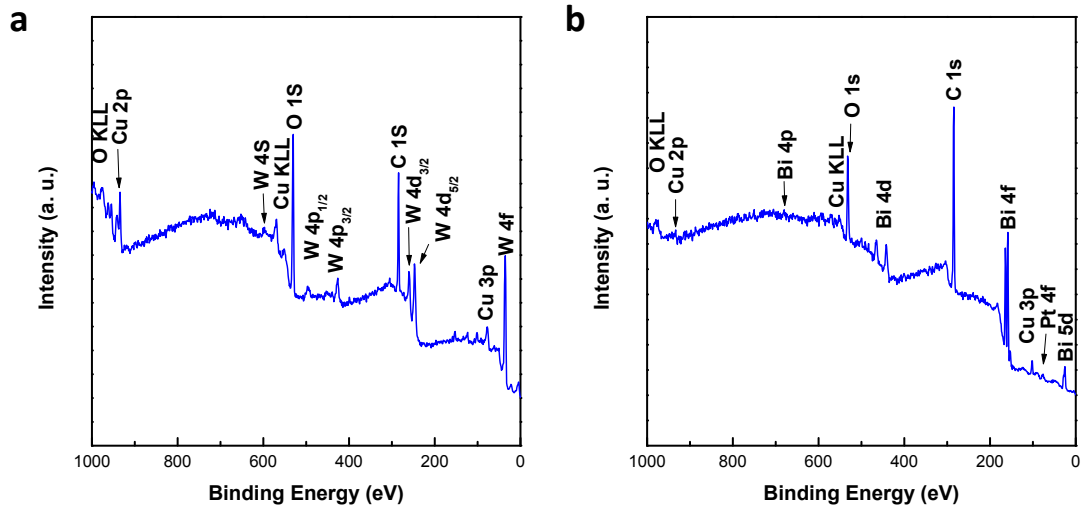

Figure S3 XPS survey spectra of (a) CuWO<sub>4</sub> film and (b) CuBi<sub>2</sub>O<sub>4</sub> film

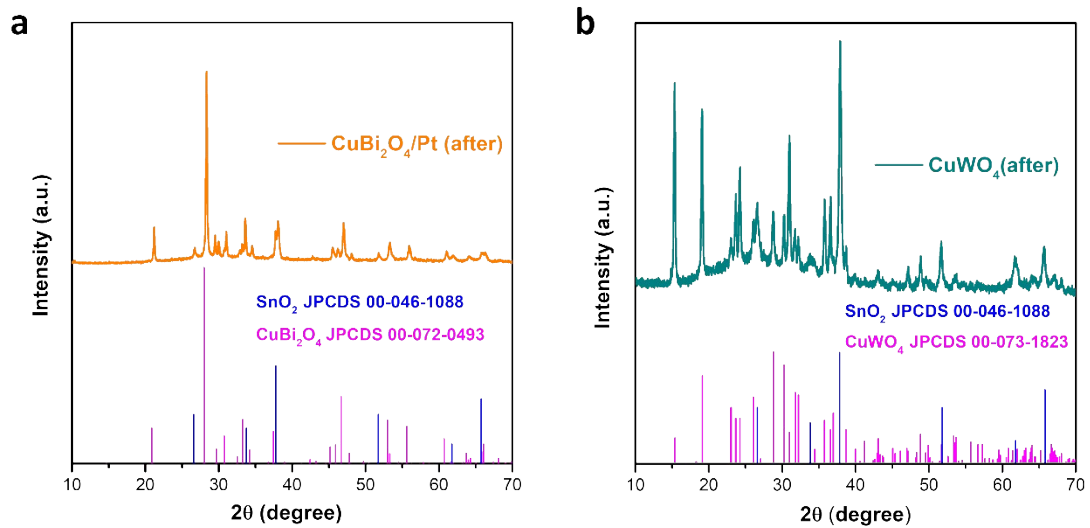

Figure S4 XRD patterns of  $\text{CuWO}_4$  film (a) and  $\text{CuBi}_2\text{O}_4$  film (b) after PEC measurement

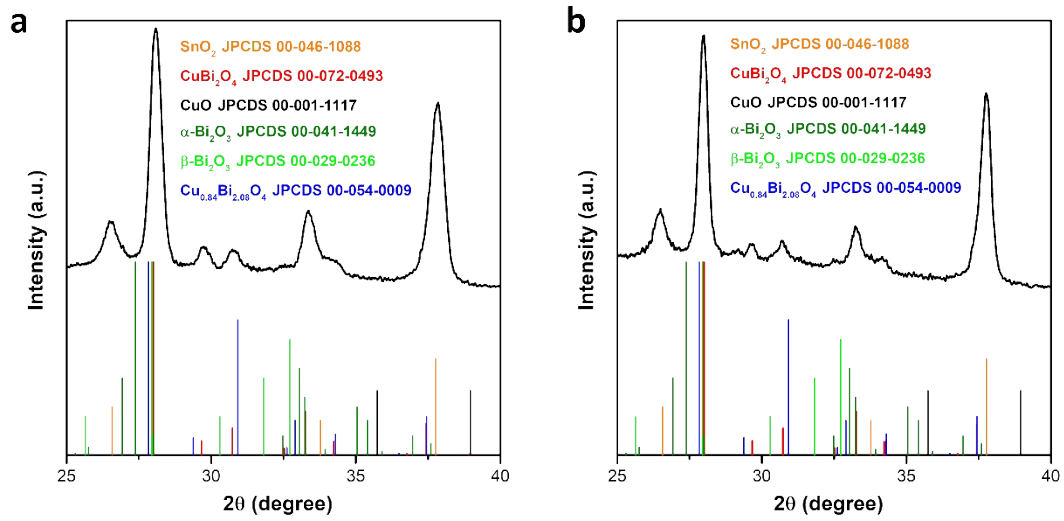

Figure S5 XRD patterns of CuBi<sub>2</sub>O<sub>4</sub> film before (a) and after (b) PEC measurement

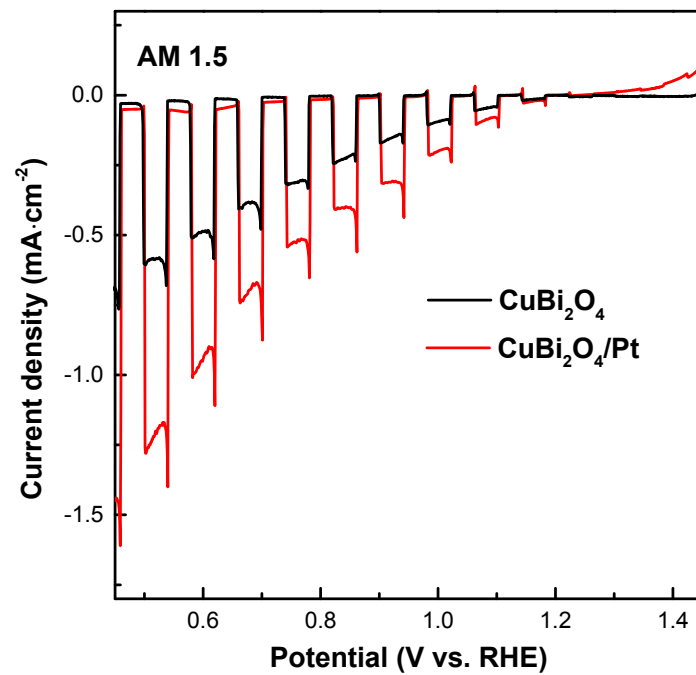

Figure S6 LSV of CuBi<sub>2</sub>O<sub>4</sub> film under chopped AM 1.5 illumination with and without Pt deposited



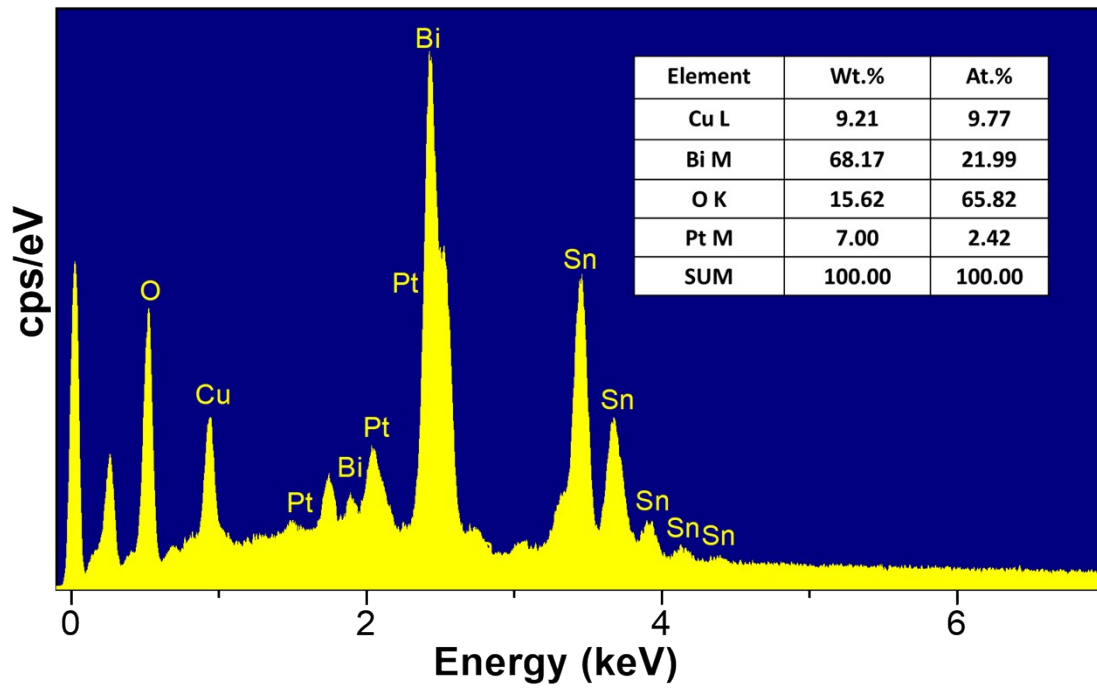

Figure S7 SEM-EDS element analysis of  $\text{CuBi}_2\text{O}_4/\text{Pt}$

Table S1 XPS data on the peak fitting analysis

| Element state         | Position (eV) | FWHM (eV) | Area    |
|-----------------------|---------------|-----------|---------|
| Bi <sup>3+</sup>      | 164.0         | 1.30      | 11431.2 |
| W <sup>6+</sup>       | 37.2          | 1.21      | 39182.1 |
| O <sup>2-</sup> (CBO) | 529.6         | 1.16      | 59289.5 |
| O <sup>2-</sup> (CWO) | 530.3         | 1.42      | 59356.5 |
